# Supplementary material for: Decreased Interactions between Calmodulin and a Mutant Huntingtin Model Might Reduce the Cytotoxic Level of Intracellular Ca2+: A Molecular Dynamics Study
Source: MDPI journal article supplement (doi:10.3390/ijms22169025), 2021-08-21
Supplement: s1 [file s1]

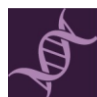

Research Article

# Decreased Interactions between Calmodulin and a Mutant Huntingtin Model Might Reduce the Cytotoxic Level of Intracellular $\text{Ca}^{2+}$ : A Molecular Dynamics Study

Sanda Nastasia Moldovean<sup>1,2</sup> and Vasile Chiș<sup>1,2\*</sup>

<sup>1</sup> Babeș-Bolyai University, Faculty of Physics, Str. M. Kogălniceanu 1, RO-400084 Cluj-Napoca, Romania

<sup>2</sup> Institute for Research, Development and Innovation in Applied Natural Sciences, Babeș-Bolyai University, Str. Fântânele 30, RO-400327, Cluj-Napoca, Romania

\* Correspondence: [vasile.chis@ubbcluj.ro](mailto:vasile.chis@ubbcluj.ro).

## Supplementary Materials

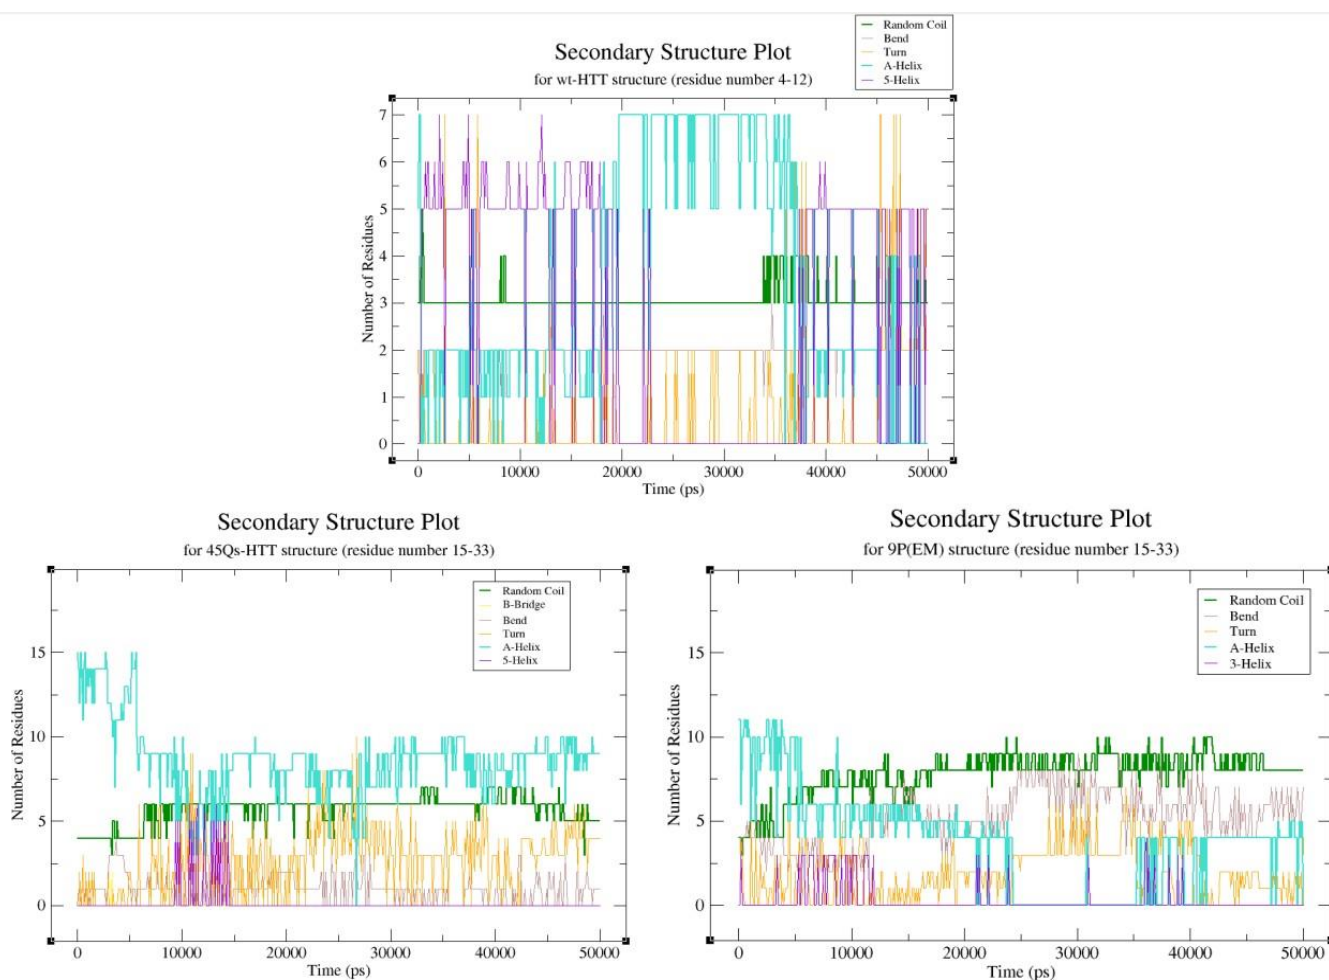

**Figure S1.** The secondary structure components in number of residues for the HTT models during their interactions with CaM protein.

All of the illustrated plots were obtained for indexed residues using the DSSP tool from the Gromacs v.2018 package.

**Table S1.** Lennard-Jones and Coulombic interaction energy components and the total interaction energies between CaM and the HTT models.

| CaM+wt-HTT                        |                          | CaM+45Qs-HTT                      |                          | CaM+9P(EM)                        |                          |
|-----------------------------------|--------------------------|-----------------------------------|--------------------------|-----------------------------------|--------------------------|
| S-R Lennard-Jones (kcal/mol)      | S-R Coulombic (kcal/mol) | S-R Lennard-Jones (kcal/mol)      | S-R Coulombic (kcal/mol) | S-R Lennard-Jones (kcal/mol)      | S-R Coulombic (kcal/mol) |
| -64.60                            | -65.50                   | -150.64                           | -163.22                  | -117.00                           | -121.95                  |
| Total interaction energy: -130.11 |                          | Total interaction energy: -313.87 |                          | Total interaction energy: -238.95 |                          |

**List of Abbreviations**

|                  |                                                                                                  |
|------------------|--------------------------------------------------------------------------------------------------|
| polyQ            | polyglutamine                                                                                    |
| Q                | glutamine                                                                                        |
| HTT              | Huntingtin                                                                                       |
| PRD              | Proline-Rich Domain                                                                              |
| m-HTT            | mutant Huntingtin                                                                                |
| wt-HTT           | wild-type Huntingtin                                                                             |
| CAG              | Cytosine Adenine Guanine                                                                         |
| 9P(EM)           | 9 mutation points at the edges and in the middle of the helix                                    |
| HD               | Huntington's disease                                                                             |
| ATP              | Adenosine 5'-triphosphate                                                                        |
| Ca <sup>2+</sup> | Calcium ions                                                                                     |
| mRNA             | messenger ribonucleic acid                                                                       |
| CaM              | Calmodulin                                                                                       |
| CNS              | Central Nervous System                                                                           |
| EF-hand          | Helix-loop-helix structural motif                                                                |
| MM/GBSA          | Molecular Mechanics energies combined with Generalized Born and Surface Area continuum solvation |
| MD               | Molecular Dynamics                                                                               |
| RMSD             | Root Mean Square Deviation                                                                       |
| RMSF             | Root Mean Square Fluctuation                                                                     |
| Rg               | Radius of gyration                                                                               |
| DSSP             | Define Secondary Structure of Proteins                                                           |
| PDB              | Protein Data Bank                                                                                |
| SPC              | Simple Point Charge                                                                              |
| NVT              | constant-temperature, constant-volume ensemble                                                   |
| NPT              | constant-temperature, constant-pressure ensemble                                                 |
| LINCS            | LINear Constraint Solver algorithm                                                               |
